# Supplementary material for: The importance of the molecular weight of PEDOT hole transporting materials for efficient organic solar cells
Source: Royal Society of Chemistry journal article supplement (doi:10.1039/d0tc04372a), 2020-01-01
Supplement: d0tc04372a1.pdf [file d0tc04372a1.pdf]

## Electronic Supplementary Information

### Importance of molecular weight of PEDOT hole transporting materials for efficient organic solar cells

Qingyao Fu,<sup>a</sup> Yuda Li,<sup>\*a</sup> Xunchang Wang,<sup>c</sup> Qi Li,<sup>a</sup> Feng Wang<sup>a</sup> and Renqiang Yang<sup>bc</sup>

<sup>a</sup>Key Laboratory for Green Chemical Process of Ministry of Education, Wuhan Institute of Technology, Wuhan 430205, China. E-mail: psydli@wit.edu.cn.

<sup>b</sup>Key Laboratory of Optoelectronic Chemical Materials and Devices (Ministry of Education), School of Chemical and Environmental Engineering, Jiangnan University, Wuhan 430056, China.

<sup>c</sup>CAS Key Laboratory of Bio-based Materials, Qingdao Institute of Bioenergy and Bioprocess Technology, Chinese Academy of Sciences, Qingdao 266101, China.

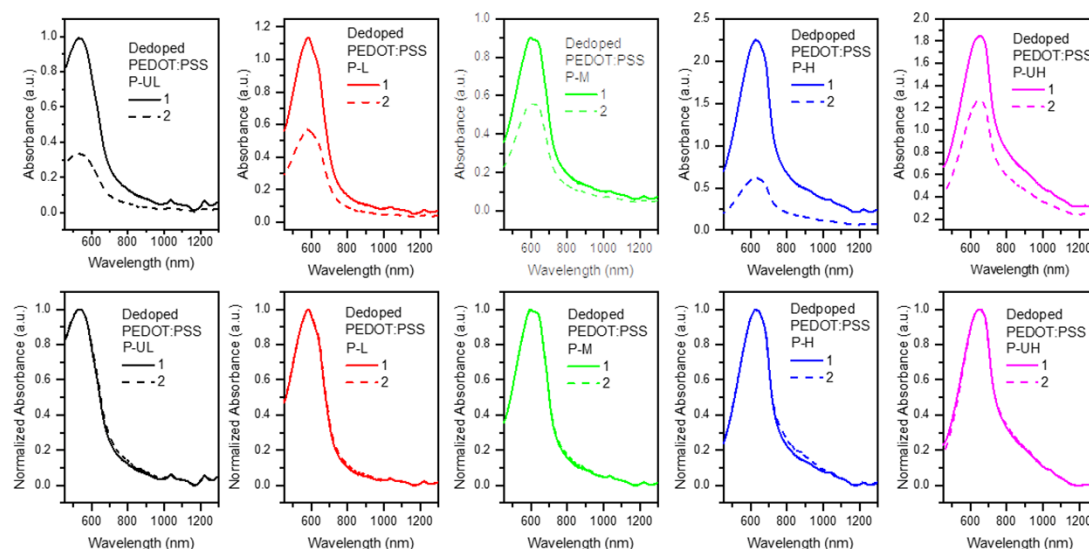

**Fig. S1** Vis-NIR absorption spectra (top) and corresponding normalized spectra (down) of dedoped PEDOT:PSS aqueous dispersions with different concentrations (1 and 2). Normalize method: normalize to [0, 1].

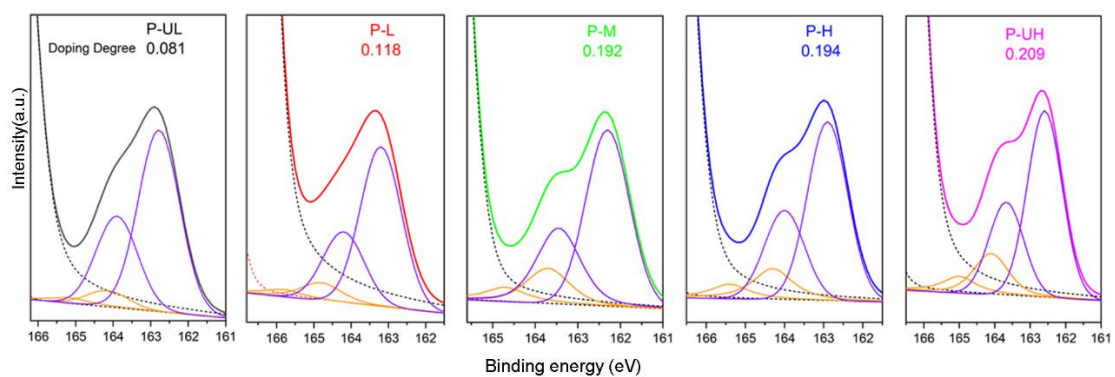

**Fig. S2** S 2p spectra of PEDOTs.

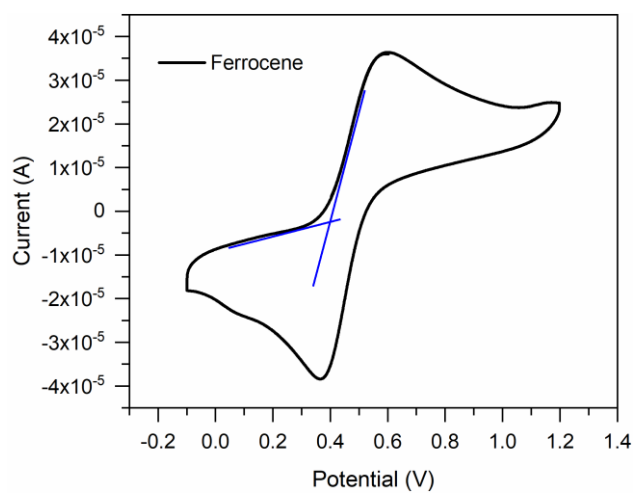

**Fig. S3** CV curve of ferrocene in 0.1M tetrabutylammonium hexafluorophosphate solution.
